# Supplementary material
Source: PubMed Central journal article supplement (PMC4445619)
Supplement: mt2014218x1.pdf [file mt2014218x1.pdf]

## Supplementary Material.

**Supplementary Table S1.** List of viruses used.

| Virus               | Serotype | E1A-promoter | E1A | Transgene in E3 | Fiber feature | Target receptor   | Reference  |
|---------------------|----------|--------------|-----|-----------------|---------------|-------------------|------------|
| Ad5-d24-RGD         | 5        | wt           | Δ24 | none            | wt (Ad5)      | CAR and integrins | (1), (2)   |
| Ad5/3-d24-GMCSF     | 5        | wt           | Δ24 | GMCSF           | Ad3 knob      | Ad3               | (3)        |
| Ad5-RGD-d24-GMCSF   | 5        | wt           | Δ24 | GMCSF           | wt (Ad5)      | CAR and integrins | (2)        |
| Ad5-d24-GMCSF       | 5        | wt           | Δ24 | GMCSF           | wt (Ad5)      | CAR               | (4)        |
| ICOVIR-7            | 5        | E2F-1        | Δ24 | none            | wt (Ad5)      | CAR and integrins | (5), (6)   |
| Ad5/3-cox2L-D24     | 5        | cox2L        | Δ24 | none            | Ad3 knob      | Ad3               | (7), (8)   |
| Ad5/3-hTERT-CD40L   | 5        | hTERT        | wt  | CD40L           | Ad3 knob      | Ad3               | (9), (10)  |
| Ad5/3-E2F-d24-GMCSF | 5        | E2F          | Δ24 | GMCSF           | Ad3 knob      | Ad3               | (11)       |
| Ad3-hTERT-E1        | 3        | hTERT        | wt  | none            | wt (Ad3)      | Ad3               | (12), (13) |

wt = wild-type; GMCSF = granulocyte-macrophage colony-stimulating factor; CAR = Coxsackie adenovirus receptor

### Supplementary Table S1 References:

- (1) Suzuki K, Fueyo J, et al. A conditionally replicative adenovirus with enhanced infectivity shows improved oncolytic potency. *Clin Cancer Res* 2001; 7:120-6
- (2) Pesonen S, Diaconu I, et al. Integrin targeted oncolytic adenoviruses Ad5-D24-RGD and Ad5-RGD-D24-GMCSF for treatment of patients with advanced chemotherapy refractory solid tumors. *Int J Cancer* 2012; 130:1937-47
- (3) Koski A, Kangasniemi L, et al. Treatment of Cancer Patients with a Serotype 5/3 Chimeric Oncolytic Adenovirus Expressing Granulocyte-Macrophage Colony Stimulating Factor. *Mol Ther* 2010; 18:1874-84
- (4) Cerullo V, Pesonen S, et al. Oncolytic adenovirus coding for GMCSF induces anti-tumoral immunity in human cancer patients. *Cancer Res* 2010; 70:4297-309
- (5) Rojas JJ, Cascallo M, et al. A modified E2F-1 promoter improves the efficacy to toxicity ratio of oncolytic adenoviruses. *Gene Ther* 2009; 16:1441-51
- (6) Nokisalmi P, Pesonen S, et al. Oncolytic Adenovirus ICOVIR-7 in Patients with Advanced and Refractory Solid Tumors. *Clin Cancer Res* 2010; 16:3035-43
- (7) Bauerschmitz GJ, Guse K, et al. Triple-targeted oncolytic adenoviruses featuring the cox2 promoter, E1A transcomplementation, and serotype chimerism for enhanced selectivity for ovarian cancer cells. *Mol Ther* 2006; 14:164-74
- (8) Pesonen S, Nokisalmi P, et al. Prolonged systemic circulation of chimeric oncolytic adenovirus Ad5/3-Cox2L-D24 in patients with metastatic and refractory solid tumors. *Gene Ther* 2010; 17:892-904
- (9) Diaconu I, Cerullo V, et al. Immune response is an important aspect of the anti-tumor effect of an oncolytic adenovirus coding for CD40L. *Cancer Res* 2012; 72:2327-38
- (10) Pesonen S, Diaconu I, et al. Oncolytic immunotherapy of advanced solid tumors with Ad5/3-hTERT-CD40L (CGTG-401): assessment of safety and immunological responses in patients. *Cancer Res* 2012; 72:1621-31
- (11) Hemminki O, Juhila J, et al. Immunological data from cancer patients treated with Ad5/3 E2F Δ24 GMCSF suggests wide applicability for tumor immunotherapy. Submitted Manuscript.
- (12) Hemminki O, Bauerschmitz G, et al. Oncolytic adenovirus based on serotype 3. *Cancer Gene Ther* 2011; 18:288-96
- (13) Hemminki O, Diaconu I, et al. Ad3-hTERT-E1A, a fully serotype 3 oncolytic adenovirus, in patients with chemotherapy refractory cancer. *Mol Ther* 2012; 20:1821-30

Supplementary Table S2. Log-rank *P*-values for comparison of survival in cases and controls: all patients.

|                | WHO          | Sex            | Age                     | Time from<br>Diagnosis | Previous<br>Regimen  | Radiation      | Surgery              |
|----------------|--------------|----------------|-------------------------|------------------------|----------------------|----------------|----------------------|
| Test used      | Mann-Whitney | Fisher's exact | Mann-Whitney            | Mann-Whitney           | Mann-Whitney         | Fisher's exact | Fisher's exact       |
| Urinary        | 0.15         | 0.51           | 0.14                    | 0.56                   | 0.32                 | 1.00           | 0.22                 |
| Gastric        | 0.38         | 0.66           | 0.10                    | 0.09                   | 0.36                 | 1.00           | 0.67                 |
| Intestinal     | 0.50         | 0.60           | 0.05                    | 0.14                   | 0.78                 | 1.00           | 1.00                 |
| Liver          | 0.96         | 0.17           | 0.09                    | 0.45                   | 0.43                 | 0.52           | 0.63                 |
| Pancreatic     | 0.48         | 0.78           | 0.25                    | 0.61                   | 0.85                 | 0.48           | 1.00                 |
| Lung           | 0.71         | 0.54           | 0.22                    | 0.50                   | 0.35                 | 0.13           | 1.00                 |
| Neuroendocrine | 0.11         | 0.22           | 0.03<br>(Ctrls older)   | 0.29                   | 0.03<br>(Cases more) | 0.29           | 0.52                 |
| Prostate       | 0.97         | All male       | 0.096<br>0.04           | 0.79                   | 0.52                 | 0.39           | 0.07                 |
| Ovarian        | 0.57         | All female     | 0.04<br>(Ctrls older)   | 0.74                   | 0.09                 | 0.56           | 0.32                 |
| Melanoma       | 0.33         | 1.00           | 0.57                    | 0.96                   | 0.72                 | 1.00           | 1.00                 |
| Mesothelioma   |              |                |                         |                        |                      |                |                      |
| Sarcoma        | 0.73         | 0.53           | 0.93                    | 0.76                   | 0.88                 | 0.52<br>0.02   | 0.74                 |
| Breast         | 0.23         | All female     | 0.20                    | 0.38                   | 0.08                 | (Cases more )  | 0.40                 |
| Uterine        | 0.31         | All female     | 1.00                    | 0.78                   | 0.58                 | 0.18           | 0.46                 |
| Head and neck  | 0.46         | 0.08           | 0.18                    | 0.90                   | 0.85                 | 1.00           | 1.00                 |
| All combined   | 0.17         | 0.25           | <0.001<br>(Ctrls older) | 0.48                   | 0.01<br>(Cases more) | 0.09           | 0.01<br>(Cases more) |

Supplementary Table S3. Log-rank *P*-values for comparison of survival in cases and controls: GMCSF treated patients.

|                               | WHO          | Sex            | Age                     | Time from<br>Diagnosis | Previous<br>Regimen  | Radiation            | Surgery              |
|-------------------------------|--------------|----------------|-------------------------|------------------------|----------------------|----------------------|----------------------|
| Test used                     | Mann-Whitney | Fisher's exact | Mann-Whitney            | Mann-Whitney           | Mann-Whitney         | Fisher's exact       | Fisher's exact       |
| Urinary                       | 0.22         | 0.52           | 0.22                    | 0.29                   | 0.18                 | 1.00                 | 0.22                 |
| Gastric*                      | 0.40         | 0.37           | 0.21                    | 0.18                   | 0.57                 | 1.00                 | 0.66                 |
| Instestinal                   | 0.81         | 0.75           | 0.10                    | 0.08                   | 0.96                 | 1.00                 | 1.00                 |
| Liver*                        | 0.96         | 0.17           | 0.09                    | 0.45                   | 0.43                 | 0.52                 | 0.63                 |
| Pancreatic                    | 0.72         | 1.00           | 0.26                    | 0.41                   | 0.78                 | 0.39                 | 0.74                 |
| Lung*                         | 0.81         | 0.75           | 0.35                    | 0.79                   | 0.38                 | 0.13                 | 1.00                 |
| Neuroendocrine                | 0.51         | 0.18           | 0.05                    | 0.49                   | 0.08                 | 1.00                 | 1.00                 |
| Prostate                      | 0.81         | All male       | 0.10                    | 0.44                   | 0.21                 | 1.00                 | 0.14                 |
| Ovarian*                      | 0.97         | All female     | 0.06                    | 0.75                   | 0.11                 | 0.56                 | 0.16                 |
| Melanoma*                     | 0.33         | 1.00           | 0.57                    | 0.96                   | 0.72                 | 1.00                 | 1.00                 |
| Mesothelioma*                 |              |                |                         |                        |                      |                      |                      |
| Sarcoma*                      | 0.89         | 0.52           | 0.98                    | 0.73                   | 0.87                 | 0.51                 | 0.74                 |
| Breast*                       | 0.22         | All female     | 0.57                    | 0.17                   | 0.07                 | 0.01<br>(Cases more) | 0.46                 |
| Uterine*                      | 0.19         | All female     | 0.60                    | 0.83                   | 0.60                 | 0.44                 | 0.44                 |
| Head and neck*                | 0.37         | 0.09           | 0.23                    | 0.67                   | 1.00                 | 1.00                 | 1.00                 |
| All combined                  | 0.58         | 0.08           | <0.001<br>(Ctrls older) | 0.37                   | 0.04<br>(Cases more) | 0.08                 | 0.01<br>(Cases more) |
| GMCSF-sensitive cancer types* | 0.97         | 0.89           | 0.01<br>(Ctrls older)   | 0.06                   | 0.05                 | 0.04<br>(Cases more) | 0.23                 |

\* indicates GMCSF-sensitive cancer type
